# Supplementary material for: Peroxisomal Atg37 binds Atg30 or palmitoyl-CoA to regulate phagophore formation during pexophagy
Source: PubMed Central journal article supplement — J Cell Biol. 2014 Feb 17;204(4):541–57. doi: 10.1083/jcb.201307050 (PMC3926955; doi:10.1083/jcb.201307050), 2014-02-17
Supplement: supp_jcb.201307050_JCB_201307050_sm.pdf [file supp_jcb.201307050_JCB_201307050_sm.pdf]

Nazarko et al., <http://www.jcb.org/cgi/content/full/jcb.201307050/DC1>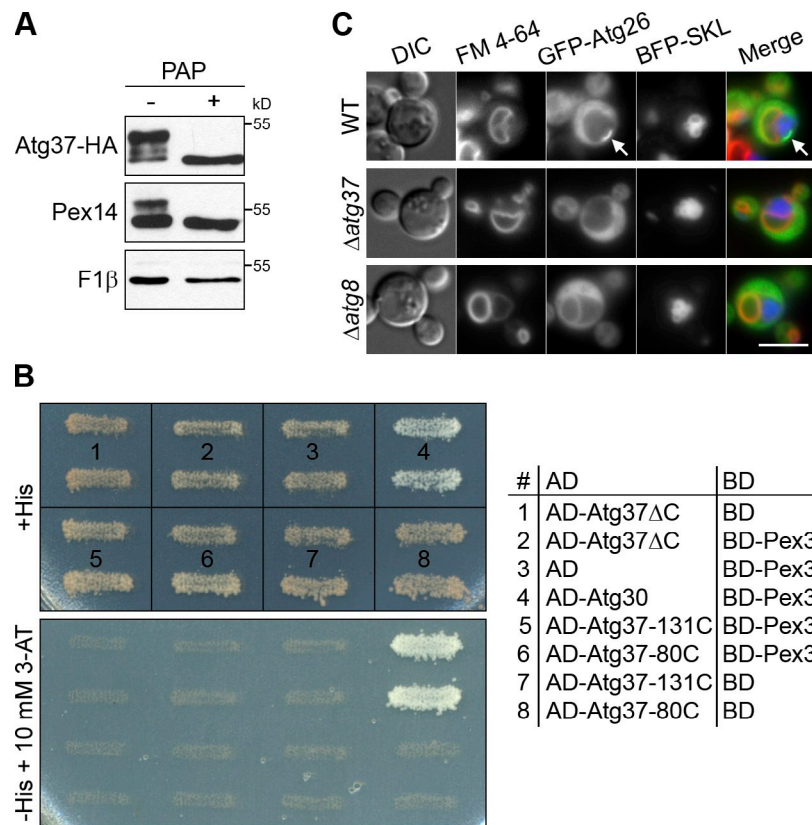

Figure S1. **Supplemental data on Atg37 modification, interaction, and the role in phagophore formation.** (A) Atg37 is a phosphoprotein. Cell lysates were incubated with (+) or without (-) PAP. (B) Atg37 does not interact with Pex3 in Y2H. Interaction was measured by the growth of cells on -His plates with 10 mM 3-AT. 3-AT, 3-amino-1,2,4-triazole; AD, activation domain; BD, binding domain. (C) Atg37 is essential for MIPA formation. Methanol-grown cells were adapted to glucose medium. Arrows point to the GFP-Atg26 labeled MIPA in the WT cell. DIC, differential interference contrast. Bar, 5  $\mu$ m.

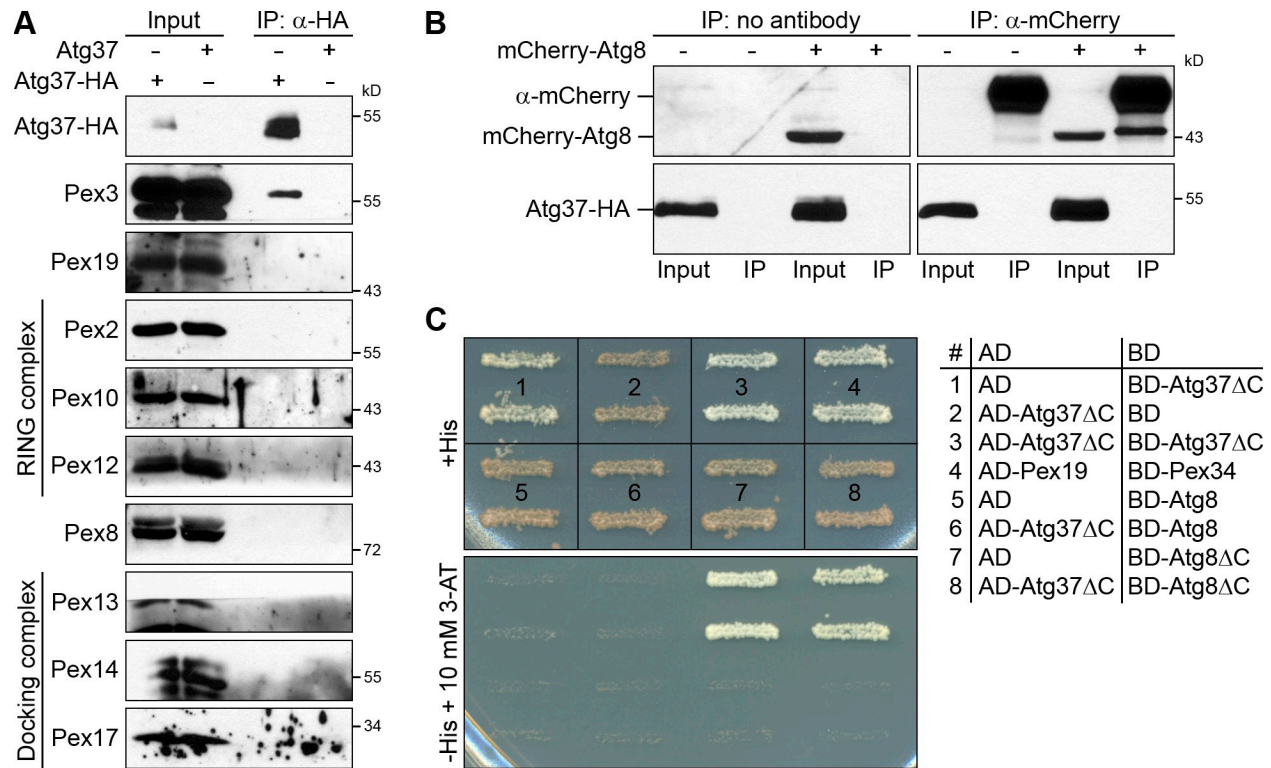

Figure S2. **Atg37 binds Pex3, but not Atg8, under pexophagy conditions.** (A) Pex3 coimmunoprecipitates with Atg37 under pexophagy conditions. Methanol-grown cells were adapted to glucose medium for 0.5 h. (B) Atg37 does not coimmunoprecipitate with Atg8. Methanol-grown cells were adapted to glucose medium for 0.5 h. The  $\alpha$ -mCherry band represents the heavy chain of the antibody. (C) Atg37 does not interact with Atg8 in Y2H. Atg37 $\Delta$ C self-interacted, but did not interact with either Atg8 or Atg8 $\Delta$ C (aa 1–115).

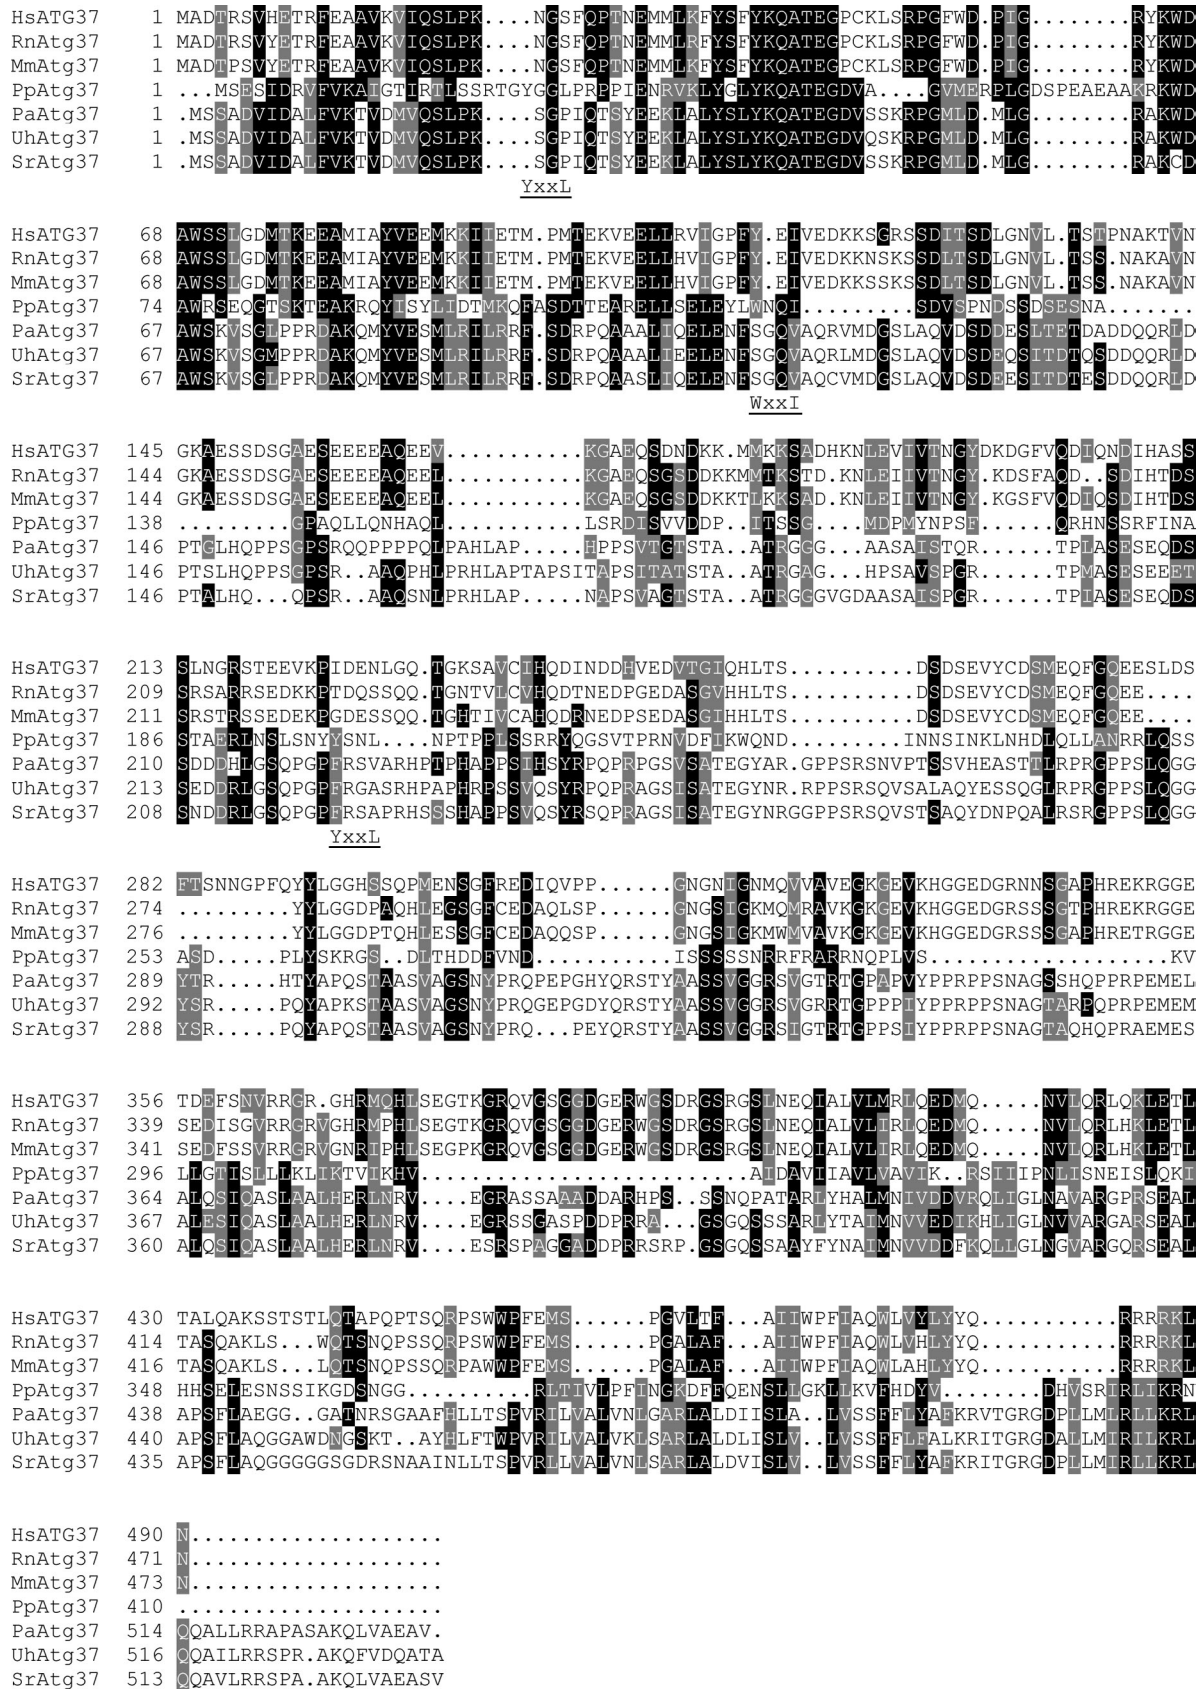

Figure S3. Multiple sequence alignment of Atg37 orthologues. Identical residues are indicated with black boxes and similar residues with gray boxes. HsATG37, *Homo sapiens* ACBD5 isoform 2 (NP\_001035938.1); RnAtg37, *Rattus norvegicus* Acbd5 (NP\_001071103.1); MmAtg37, *Mus musculus* Acbd5 (AAH61484.2); PpAtg37, *Komagataella* (formerly *Pichia*) *pastoris* GS115 Atg37 (CAY71862.1); PaAtg37, *Pseudozyma antarctica* T-34 Atg37 (GAC77071.1); UhAtg37, *Ustilago hordei* Atg37 (CCF51006.1); SrAtg37, *Sporisorium reilianum* SR22 Atg37 (CBQ71469.1). The potential AIMS of PpAtg37 are underlined below the aligned sequences.



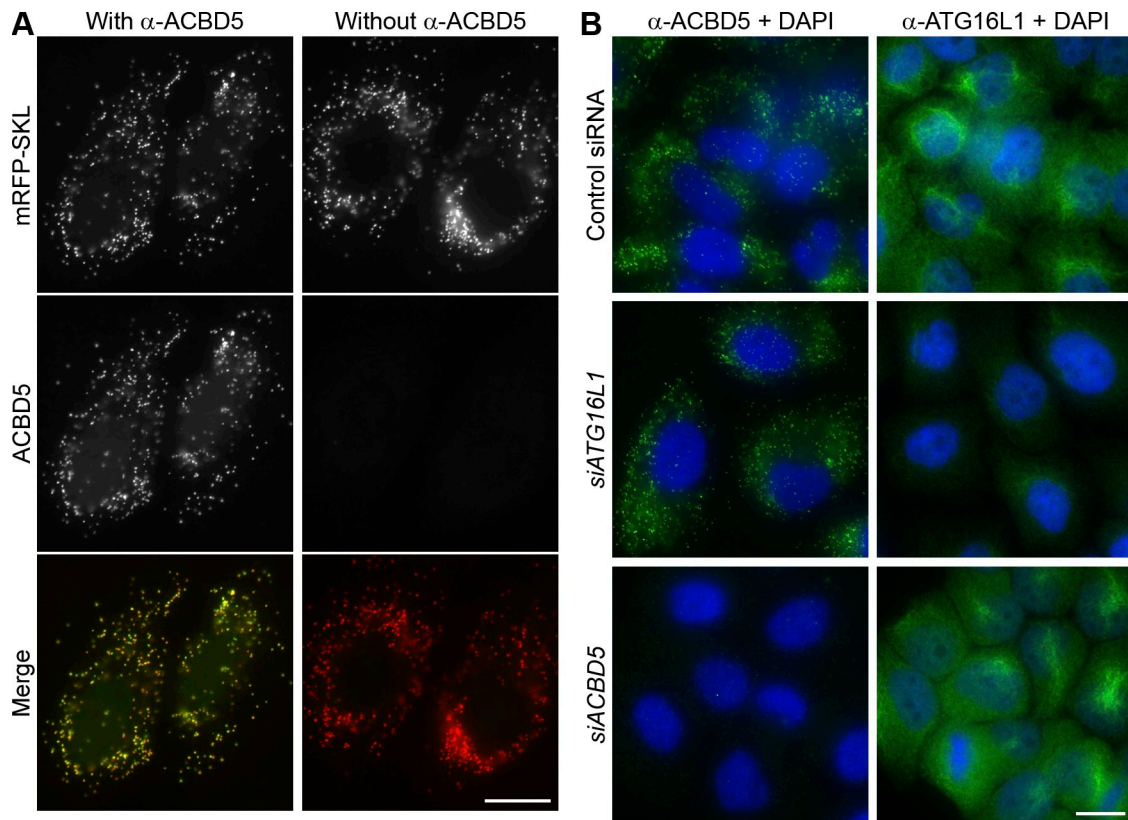

Figure S4. **ATG37/ACBD5 localizes to peroxisomes in human cells.** (A) ACBD5 is localized to peroxisomes in HeLa cells. Cells expressed peroxisomally targeted mRFP-SKL and were immunostained with antibody to ACBD5. Secondary antibody alone did not show any signal in the respective channel (right). Bar, 10  $\mu$ m. (B) siRNAs efficiently down-regulate ATG16L1 and ACBD5 in HeLa cells. Cells were transfected with nontargeting control siRNA or siRNA targeting ACBD5 or ATG16L1 for 3 d and immunostained with antibodies to ACBD5 (left) or ATG16L1 (right). DAPI stained nuclei. Bar, 10  $\mu$ m.

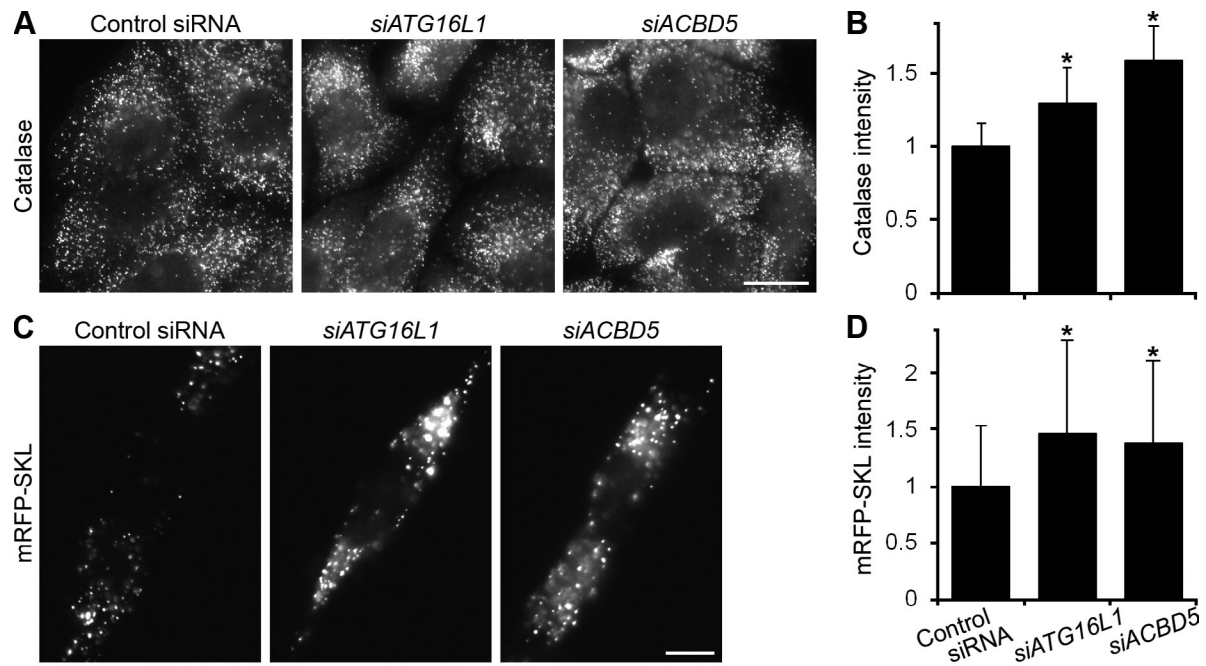

Figure S5. **Role of ATG37/ACBD5 in pexophagy.** (A) Knockdown of ACBD5 increases the peroxisome abundance in HeLa cells. Immunostaining with antibodies to peroxisomal catalase is shown. Bar, 10  $\mu$ m. (B) Quantitation of data in A. Catalase intensity of cells transfected with control siRNA was set as 1. Relative catalase intensity is shown as the mean + SD (error bars;  $n \geq 250$ ; \*,  $P < 0.05$  vs. control siRNA). (C) Knockdown of ACBD5 increases the peroxisome abundance in primary fibroblasts of a patient with a PBD caused by a missense mutation in the *PEX16* gene. Bar, 10  $\mu$ m. (D) Quantitation of data in C. mRFP-SKL intensity of cells transfected with control siRNA was set as 1. Relative mRFP-SKL intensity is shown as the mean + SD (error bars;  $n \geq 20$ ; \*,  $P < 0.05$  vs. control siRNA).

Table S1. *P. pastoris* strains and plasmids used in this study

| Name     | Description                 | Genotype and plasmid                                                                          | Source                  |
|----------|-----------------------------|-----------------------------------------------------------------------------------------------|-------------------------|
| PDG2d    | <i>Δatg28</i>               | GS200 <i>Δatg28::ScARG4</i>                                                                   | Stasyk et al., 2006     |
| PPY12h   | WT                          | <i>arg4 his4</i>                                                                              | Gould et al., 1992      |
| PPY12m   | WT                          | <i>arg4 his4</i>                                                                              | Gould et al., 1992      |
| R8       | <i>Δatg11</i>               | GS115 <i>atg11-2::Zeocin<sup>R</sup></i>                                                      | Kim et al., 2001        |
| SEW1     | <i>Δpex3</i>                | PPY12h <i>Δpex3::ARG4</i>                                                                     | Wiemer et al., 1996     |
| SKF13    | <i>Δpex19</i>               | PPY12h <i>Δpex19::Zeocin<sup>R</sup></i>                                                      | Snyder et al., 1999     |
| SJCF51   | WT                          | PPY12m <i>his4::pTW51 (P<sub>AOX1</sub>-GFP-SKL, HIS4)</i>                                    | Nazarko et al., 2009    |
| SJCF320  | WT                          | SJCF247 <i>his4::pJCF208 (P<sub>ATG8</sub>-GFP-ATG8, HIS4)</i>                                | Farré et al., 2008      |
| SJCF376  | <i>Δatg30</i>               | SJCF332 <i>his4::pJCF208 (P<sub>ATG8</sub>-GFP-ATG8, HIS4)</i>                                | Farré et al., 2008      |
| SJCF547  | WT                          | PPY12m <i>his4::pJCF208 (P<sub>ATG8</sub>-GFP-ATG8, HIS4)</i>                                 | Farré et al., 2008      |
| SJCF925  | <i>Δatg8</i>                | PPY12h <i>Δatg8::Geneticin<sup>R</sup> (pJCF182)</i>                                          | Nazarko et al., 2009    |
| SJCF936  | <i>Δatg30</i>               | PPY12h <i>Δatg30::Zeocin<sup>R</sup> (pJCF56)</i>                                             | Nazarko et al., 2009    |
| SJCF1821 | <i>Δatg30</i>               | SJCF959 <i>P<sub>AOX1</sub>::pPICz-BFP-SKL (P<sub>AOX1</sub>-BFP-SKL, Zeocin<sup>R</sup>)</i> | Farré et al., 2013      |
| SMD1163  | <i>pep4 prb1 his4</i>       | <i>pep4 prb1 his4</i>                                                                         | Tuttle and Dunn, 1995   |
| SMY154   | WT                          | PPY12h <i>PEX3::pMY126 (P<sub>PEX3</sub>-PEX3-TAP, Zeocin<sup>R</sup>)</i>                    | This paper              |
| SMY431   | <i>Δpmp47</i>               | PPY12m <i>Δpmp47::Zeocin<sup>R</sup> (pMY243)</i>                                             | This paper              |
| SMY432   | <i>Δatg37</i>               | PPY12m <i>Δatg37::Zeocin<sup>R</sup> (pMY92)</i>                                              | This paper              |
| SMY433   | WT                          | SMY432 <i>his4::pMY244 (P<sub>GAPDH</sub>-GFP-ATG37, HIS4)</i>                                | This paper              |
| SMY437   | <i>Δatg37</i>               | SMY432 <i>his4::pTW51 (P<sub>AOX1</sub>-GFP-SKL, HIS4)</i>                                    | This paper              |
| SMY448   | WT                          | PPY12m <i>his4::pMY244 (P<sub>GAPDH</sub>-GFP-ATG37, HIS4)</i>                                | This paper              |
| SRRM197  | <i>Δypt7</i>                | PPY12h <i>Δypt7::Geneticin<sup>R</sup></i>                                                    | Manjithaya et al., 2010 |
| STN29    | <i>Δatg1</i>                | R12 <i>his4::pTW51 (P<sub>AOX1</sub>-GFP-SKL, HIS4)</i>                                       | Nazarko et al., 2007    |
| STN48    | <i>Δatg37</i>               | SMY432 <i>P<sub>AOX1</sub>::pRDM054 (P<sub>AOX1</sub>-BFP-SKL, Hygromycin<sup>R</sup>)</i>    | This paper              |
| STN50    | <i>Δatg37</i>               | STN48 <i>his4::pJCF208 (P<sub>ATG8</sub>-GFP-ATG8, HIS4)</i>                                  | This paper              |
| STN52    | <i>Δatg37</i>               | SMY432 <i>his4::pJCF208 (P<sub>ATG8</sub>-GFP-ATG8, HIS4)</i>                                 | This paper              |
| STN66    | <i>Δatg1</i>                | R12 <i>his4::pJCF208 (P<sub>ATG8</sub>-GFP-ATG8, HIS4)</i>                                    | Nazarko et al., 2009    |
| STN95    | <i>Δatg30 Δatg37</i>        | SJCF936 <i>Δatg37::Geneticin<sup>R</sup> (pMY92Kan)</i>                                       | This paper              |
| STN96    | <i>Δatg37</i>               | PPY12h <i>Δatg37::Geneticin<sup>R</sup> (pMY92Kan)</i>                                        | This paper              |
| STN117   | WT                          | PPY12h <i>his4::pJCF392 (P<sub>GAPDH</sub>-GFP-ATG26, HIS4)</i>                               | This paper              |
| STN119   | <i>Δatg8</i>                | SJCF925 <i>his4::pJCF392 (P<sub>GAPDH</sub>-GFP-ATG26, HIS4)</i>                              | This paper              |
| STN126   | WT                          | SJCF936 <i>his4::pJCF213 (P<sub>ATG30</sub>-ATG30-GFP, HIS4)</i>                              | This paper              |
| STN128   | WT                          | STN96 <i>his4::pMY323 (P<sub>ATG37</sub>-ATG37-GFP, HIS4)</i>                                 | This paper              |
| STN130   | WT                          | SJCF936 <i>his4::pJCF45 (P<sub>GAPDH</sub>-ATG30-GFP, HIS4)</i>                               | This paper              |
| STN132   | WT                          | STN96 <i>his4::pTYN4 (P<sub>GAPDH</sub>-ATG37-GFP, HIS4)</i>                                  | This paper              |
| STN139   | WT                          | STN96 <i>his4::pMY244 (P<sub>GAPDH</sub>-GFP-ATG37, HIS4)</i>                                 | This paper              |
| STN148   | <i>Δatg30</i>               | STN95 <i>his4::pTYN4 (P<sub>GAPDH</sub>-ATG37-GFP, HIS4)</i>                                  | This paper              |
| STN149   | <i>Δatg37</i>               | STN95 <i>his4::pJCF45 (P<sub>GAPDH</sub>-ATG30-GFP, HIS4)</i>                                 | This paper              |
| STN155   | <i>Δatg30</i>               | STN95 <i>his4::pMY323 (P<sub>ATG37</sub>-ATG37-GFP, HIS4)</i>                                 | This paper              |
| STN161   | WT                          | STN128 <i>P<sub>AOX1</sub>::pRDM054 (P<sub>AOX1</sub>-BFP-SKL, Hygromycin<sup>R</sup>)</i>    | This paper              |
| STN163   | <i>Δatg30</i>               | STN155 <i>P<sub>AOX1</sub>::pRDM054 (P<sub>AOX1</sub>-BFP-SKL, Hygromycin<sup>R</sup>)</i>    | This paper              |
| STN199   | WT                          | STN126 <i>P<sub>AOX1</sub>::pRDM054 (P<sub>AOX1</sub>-BFP-SKL, Hygromycin<sup>R</sup>)</i>    | This paper              |
| STN201   | <i>Δatg37</i>               | STN95 <i>his4::pJCF213 (P<sub>ATG30</sub>-ATG30-GFP, HIS4)</i>                                | This paper              |
| STN203   | <i>Δatg37</i>               | STN201 <i>P<sub>AOX1</sub>::pRDM054 (P<sub>AOX1</sub>-BFP-SKL, Hygromycin<sup>R</sup>)</i>    | This paper              |
| STN215   | WT                          | STN96 <i>his4::pMY320 (P<sub>ATG37</sub>-ATG37-2xHA, HIS4)</i>                                | This paper              |
| STN245   | WT                          | PPY12h <i>ATG37::pMY328 (P<sub>ATG37</sub>-ATG37-GFP, ARG4)</i>                               | This paper              |
| STN249   | <i>Δpex19</i>               | SKF13 <i>ATG37::pMY328 (P<sub>ATG37</sub>-ATG37-GFP, ARG4)</i>                                | This paper              |
| STN255   | WT                          | STN245 <i>his4::pKSN183 (P<sub>PEX3</sub>-PEX3-mRFP1, HIS4)</i>                               | This paper              |
| STN260   | <i>Δpex19</i>               | STN249 <i>his4::pKSN183 (P<sub>PEX3</sub>-PEX3-mRFP1, HIS4)</i>                               | This paper              |
| STN286   | WT                          | STN288 <i>P<sub>AOX1</sub>::pRDM054 (P<sub>AOX1</sub>-BFP-SKL, Hygromycin<sup>R</sup>)</i>    | This paper              |
| STN288   | WT                          | STN128 <i>arg4::pJCF477 (P<sub>ATG8</sub>-mCHERRY-ATG8, ARG4)</i>                             | This paper              |
| STN292   | <i>acbs</i>                 | STN96 <i>his4::pTYN21 (P<sub>ATG37</sub>-ATG37<sup>Y40E, K44A</sup>-2xHA, HIS4)</i>           | This paper              |
| STN294   | <i>Atg37<sup>ΔTMD</sup></i> | STN96 <i>his4::pTYN24 (P<sub>ATG37</sub>-ATG37<sup>Δ290,339</sup>-GFP, HIS4)</i>              | This paper              |
| STN300   | <i>acbs</i>                 | STN96 <i>his4::pTYN22 (P<sub>ATG37</sub>-ATG37<sup>Y40E, K44A</sup>-GFP, HIS4)</i>            | This paper              |
| STN352   | <i>acbs</i>                 | STN300 <i>P<sub>AOX1</sub>::pRDM054 (P<sub>AOX1</sub>-BFP-SKL, Hygromycin<sup>R</sup>)</i>    | This paper              |
| STN356   | <i>Atg37<sup>ΔTMD</sup></i> | STN294 <i>P<sub>AOX1</sub>::pRDM054 (P<sub>AOX1</sub>-BFP-SKL, Hygromycin<sup>R</sup>)</i>    | This paper              |
| STN363   | WT                          | STN215 <i>arg4::pJCF477 (P<sub>ATG8</sub>-mCHERRY-ATG8, ARG4)</i>                             | This paper              |
| STN556   | WT                          | STN96 <i>his4::pKO8 (P<sub>ATG37</sub>-GFP-ATG37, HIS4)</i>                                   | This paper              |
| STN563   | <i>Δatg30</i>               | STN95 <i>his4::pMY320 (P<sub>ATG37</sub>-ATG37-2xHA, HIS4)</i>                                | This paper              |

Table S1. *P. pastoris* strains and plasmids used in this study (Continued)

| Name   | Description                | Genotype and plasmid                                                                        | Source     |
|--------|----------------------------|---------------------------------------------------------------------------------------------|------------|
| STN566 | $\Delta atg30 \Delta ypt7$ | SJCF1736 ATG37::pMY328 (P <sub>ATG37</sub> -ATG37-GFP, ARG4)                                | This paper |
| STN567 | $\Delta ypt7$              | SJCF1809 ATG37::pMY328 (P <sub>ATG37</sub> -ATG37-GFP, ARG4)                                | This paper |
| STN605 | $\Delta atg37$             | STN96 <i>his4</i> ::pJCF392 (P <sub>GAPDH</sub> -GFP-ATG26, HIS4)                           | This paper |
| STN612 | WT                         | STN117 P <sub>AOX1</sub> ::pRDM054 (P <sub>AOX1</sub> -BFP-SKL, Hygromycin <sup>R</sup> )   | This paper |
| STN614 | $\Delta atg8$              | STN119 P <sub>AOX1</sub> ::pRDM054 (P <sub>AOX1</sub> -BFP-SKL, Hygromycin <sup>R</sup> )   | This paper |
| STN616 | $\Delta atg37$             | STN605 P <sub>AOX1</sub> ::pRDM054 (P <sub>AOX1</sub> -BFP-SKL, Hygromycin <sup>R</sup> )   | This paper |
| STN618 | WT                         | PPY12h P <sub>AOX1</sub> ::pPICz-BFP-SKL (P <sub>AOX1</sub> -BFP-SKL, Zeocin <sup>R</sup> ) | This paper |
| STN620 | $\Delta atg37$             | STN96 P <sub>AOX1</sub> ::pPICz-BFP-SKL (P <sub>AOX1</sub> -BFP-SKL, Zeocin <sup>R</sup> )  | This paper |
| STN622 | $\Delta ypt7$              | SRRM197 <i>arg4</i> ::pJCF340 P <sub>ATG11</sub> -2xFLAG-ATG11, ARG4)                       | This paper |
| STN630 | $\Delta ypt7$              | STN622 <i>his4</i> ::pJCF343 (P <sub>GAPDH</sub> -ATG30-TAP, HIS4)                          | This paper |
| STN632 | $\Delta ypt7$              | STN630 <i>his4</i> ::pTYN57 (P <sub>GAPDH</sub> -GFP-ATG17, Hygromycin <sup>R</sup> )       | This paper |
| STN634 | $\Delta ypt7$              | STN622 <i>his4</i> ::pTYN57 (P <sub>GAPDH</sub> -GFP-ATG17, Hygromycin <sup>R</sup> )       | This paper |
| STN636 | WT                         | STN618 <i>arg4</i> ::pJCF291 P <sub>ATG11</sub> -GFP-ATG11, ARG4)                           | This paper |
| STN639 | $\Delta atg37$             | STN620 <i>arg4</i> ::pJCF291 P <sub>ATG11</sub> -GFP-ATG11, ARG4)                           | This paper |
| STN640 | $\Delta atg30$             | SJCF1821 <i>arg4</i> ::pJCF291 P <sub>ATG11</sub> -GFP-ATG11, ARG4)                         | This paper |
| STN641 | $\Delta ypt7 \Delta atg37$ | STN632 $\Delta atg37$ ::Zeocin <sup>R</sup> (pMY92) colony #2                               | This paper |
| STN642 | $\Delta ypt7 \Delta atg37$ | STN632 $\Delta atg37$ ::Zeocin <sup>R</sup> (pMY92) colony #3                               | This paper |

## References

- Farré, J.C., R. Manjithaya, R.D. Mathewson, and S. Subramani. 2008. PpAtg30 tags peroxisomes for turnover by selective autophagy. *Dev. Cell.* 14:365–376. <http://dx.doi.org/10.1016/j.devcel.2007.12.011>
- Farré, J.C., A. Burkenroad, S.F. Burnett, and S. Subramani. 2013. Phosphorylation of mitophagy and pexophagy receptors coordinates their interaction with Atg8 and Atg11. *EMBO Rep.* 14:441–449. <http://dx.doi.org/10.1038/embor.2013.40>
- Gould, S.J., D. McCollum, A.P. Spong, J.A. Heyman, and S. Subramani. 1992. Development of the yeast *Pichia pastoris* as a model organism for a genetic and molecular analysis of peroxisome assembly. *Yeast.* 8:613–628. <http://dx.doi.org/10.1002/yea.320080805>
- Kim, J., Y. Kamada, P.E. Stromhaug, J. Guan, A. Hefner-Gravink, M. Baba, S.V. Scott, Y. Ohsumi, W.A. Dunn Jr., and D.J. Klionsky. 2001. Cvt9/Gsa9 functions in sequestering selective cytosolic cargo destined for the vacuole. *J. Cell Biol.* 153:381–396. <http://dx.doi.org/10.1083/jcb.153.2.381>
- Manjithaya, R., C. Anjard, W.F. Loomis, and S. Subramani. 2010. Unconventional secretion of *Pichia pastoris* Acb1 is dependent on GRASP protein, peroxisomal functions, and autophagosome formation. *J. Cell Biol.* 188:537–546. <http://dx.doi.org/10.1083/jcb.200911149>
- Nazarko, T.Y., A.S. Polupanov, R.R. Manjithaya, S. Subramani, and A.A. Sibirny. 2007. The requirement of sterol glucoside for pexophagy in yeast is dependent on the species and nature of peroxisome inducers. *Mol. Biol. Cell.* 18:106–118. <http://dx.doi.org/10.1091/mbc.E06-06-0554>
- Nazarko, T.Y., J.C. Farré, and S. Subramani. 2009. Peroxisome size provides insights into the function of autophagy-related proteins. *Mol. Biol. Cell.* 20:3828–3839. <http://dx.doi.org/10.1091/mbc.E09-03-0221>
- Snyder, W.B., K.N. Faber, T.J. Wenzel, A. Koller, G.H. Lüers, L. Rangell, G.A. Keller, and S. Subramani. 1999. Pex19p interacts with Pex3p and Pex10p and is essential for peroxisome biogenesis in *Pichia pastoris*. *Mol. Biol. Cell.* 10:1745–1761. <http://dx.doi.org/10.1091/mbc.10.6.1745>
- Stasyk, O.V., O.G. Stasyk, R.D. Mathewson, J.C. Farré, V.Y. Nazarko, O.S. Krasovska, S. Subramani, J.M. Cregg, and A.A. Sibirny. 2006. Atg28, a novel coiled-coil protein involved in autophagic degradation of peroxisomes in the methylotrophic yeast *Pichia pastoris*. *Autophagy.* 2:30–38.
- Tuttle, D.L., and W.A. Dunn Jr. 1995. Divergent modes of autophagy in the methylotrophic yeast *Pichia pastoris*. *J. Cell Sci.* 108:25–35.
- Wiemer, E.A., G.H. Lüers, K.N. Faber, T. Wenzel, M. Veenhuis, and S. Subramani. 1996. Isolation and characterization of Pas2p, a peroxisomal membrane protein essential for peroxisome biogenesis in the methylotrophic yeast *Pichia pastoris*. *J. Biol. Chem.* 271:18973–18980. <http://dx.doi.org/10.1074/jbc.271.31.18973>
